# Supplementary material for: Detection of Genomic Selection Signatures and Identification of Beneficial Mutations for Fat Deposition in Sheep with Different Tail Types
Source: Research Square preprint supplement (doi:10.21203/rs.3.rs-8637217/v1), 2026-02-20
Supplement: Supplementary file 1 [file fb69800362dde7ad47723448.docx]

Supplementary Materials for

**Detection of Genomic Selection Signatures and Identification of Beneficial Mutations for Fat Deposition in Sheep with Different Tail Types**

Caiye Zhu *et al.*

*Corresponding author. Email: 17899312814@163.com.

Tables S1 to S5#

**Table S1. Primer sequences for the *LPIN1* overexpression vector**

| Primer name | Primer sequence |
| --- | --- |
| pcDNA3.1-LPIN1-CC/pcDNA3.1-LPIN1-TT | F:AAGCTTATGCATCACCACCATCATCACATGAACTACGTCGGGCAGCT |
| R:CCACACTGGACTAGTGGATCCCTAGGCTGATGCAGAATGAAC |

**Table S2. siRNA interference sequence targeting *LPIN1***

| Sequence name | Sense strand（5’-3’） | Antisense strand（3’-5’） |
| --- | --- | --- |
| Si-LPIN1 | GCAACAGAGUUGUCAUCAATT | UUGAUGACAACUCUGUUGCTT |
| Negative control | UUCUCCGAACGUGUCACGUTT | ACGUGACACGUUCGGAGAATT |

**Table S3. Regions under selection in the sheep genome**

| Method | Item | ALT | Tib |
| --- | --- | --- | --- |
| Fst | Number of regions | 144 | 236 |
|  | Total length (Mb) | 70.14 | 122.87 |
| XPEHH | Number of regions | 12 | 24 |
|  | Total length (Mb) | 5.82 | 10.29 |

**Table S4. Two methods for detecting hidden genes in selection regions**

| Region | chr | start | stop | Size(Mb) | gene |
| --- | --- | --- | --- | --- | --- |
| 1 | 1 | 94694534 | 94795812 | 0.58 | *SPAG17* |
| 2 | 3 | 40075726 | 40218619 | 1.05 | *LPIN1,PNO1, PPP3R1, WDR92* |
| 3 | 4 | 68496256 |  | 1.14 | *HIBADH,EVX1, HOXA11,RPS18, HOXA1, HOXA10* |
| 4 | 5 | 10486050 | 10489711 | 0.4 | *CACNA1A, IER2, LYL1, NACC1, NFIX, RPL36, STX10, TRMT1* |
| 5 | 5 | 15893703 | 16454291 | 0.96 | *MLLT1, ACSBG2, CAPS, DUS3L, FUT3, NDUFA11, NRTN, PRR22, RANBP3, RFX2, VMAC,* *TMEM146,* *HSD11B1L, LONP1,* *RPL36,* *QIL1,* *SAFB,* *RPS24,* *SAFB2* |
| 6 | 7 | 82463975 | 82696681 | 0.63 | *LIN52, VSX2, ABCD4, ISCA2, LTBP2, NPC2, TMEM90A, VRTN,* |
| 7 | 8 | 49239651 | 49247268 | 0.41 | *SPACA1* |
| 8 | 8 | 87643281 | 87898346 | 0.66 | *RPS6KA2,* *SFT2D1* |
| 9 | 11 | 18276931 | 18538467 | 0.66 | *NF1* |
| 10 | 11 | 39037454 | 39020292 | 0.4 | *LASP1,* *RPL23* |
| 11 | 13 | 33548480 | 33580453 | 0.43 | *SVIL,* *ZNF438,* |
| 12 | 13 | 48557751 | 49354226 | 1.19 | *PPP1CC* |
| 13 | 15 | 72508021 | 72589170 | 0.48 | *STIM1,* *ALX4,* *EXT2* |
| 14 | 19 | 31646295 | 31663344 | 0.42 | *MITF* |
| 15 | 20 | 17325602 | 17534704 | 0.61 | *MRPS18A,* *VEGFA* |

Table S5 Primer information

| Primer name | Primer sequence |
| --- | --- |
| *LPIN1* | F:ATGAACTACGTCGGGCAGCTG |
| R:CTAGGCTGATGCAGAATGAACATC |
| *PPARγ* | F:CGAACTTGGGCTCCATAAAG |
| R:GCTGGCCTCCTTGATGAATA |
| *LPL* | F:GAAGCTCCAAGTCGCCTTTC |
| R:TCGTGGGAGCACTTCACTAG |
| *C/EBPα* | F:CCGGTTTCGAAGTTGATGC |
| R:TGTTCTTAATGCTCGAAACGG |
| *β-actin* | F:AGCCTTCCTTCCTGGGCATGGA |
